# Supplementary material
Source: PubMed Central journal article supplement (PMC1617155)
Supplement: rsbl20050324s01.pdf [file rsbl20050324s01.pdf]

# ELECTRONIC APPENDIX

This is the Electronic Appendix to the article

**Image content influences men's semen quality**

by

Sarah J. Kilgallon and Leigh W. Simmons

*Biol. Lett.* ([doi:10.1098/rsbl.2005.0324](https://doi.org/10.1098/rsbl.2005.0324))

Electronic appendices are refereed with the text; however, no attempt is made to impose a uniform editorial style on the electronic appendices.

## Electronic supplemental Data

### Image content influences men's semen quality

**Kilgallon, S.J. & Simmons, L.W.**

#### Lifestyle factors

We provided participants with a lifestyle questionnaire that sought information on factors that might have influenced, or are known to influence semen quality. The questions were based on a thorough search of the medical literature for data relating mens reproductive health to environmental and lifestyle factors (for example see Figa-Talamanca *et al.* 1996; Chia *et al.* 2000; Sharpe 2000; Auger *et al.* 2001; Tsujimura *et al.* 2004). Copies of the questionnaire are available from the authors on request.

The questions were broadly categorised into four areas. First, we asked about their sexual lives: were they in a stable relationship, did they have children, and how regularly did they engaged in sexual activity (intercourse and/or masturbation per week)? We also asked about their use of sexually explicit literature. In particular, we asked whether the images they were provided during the experiment were more or less explicit than the material they had viewed previously. Second, we sought information regarding their state of health. Participants were asked about recent illnesses and whether they were currently taking, or had recently taken medications. Medications were categorised as none, medications with no known influence on fertility, and medications that have reported side effects on fertility. Subjects were asked if they had experienced any trauma and/or injury to the testes or had experienced any other reproductive tract condition. They were asked if they were experiencing any stress, whether they exercised regularly, and about factors in their diet that might influence semen quality. For example, they were asked how often they took vitamin C supplements or foods rich in vitamin C, zinc/mineral supplements or foods rich in zinc, and iron supplements. And we sought information about the likelihood that they had experienced raised scrotal temperatures by asking if they had recently experienced a fever, whether they regularly wore tight fitting jeans and underwear, or took regular hot baths. Third, we asked subjects about exposure to known xenobiotics. We asked if they smoked cigarettes or marijuana or took any other recreational drugs. They were asked how many standard alcoholic drinks they consumed per week, and the number of caffeinated drinks (coffee/coke) they consumed per day, and they were asked if they had regular contact with lead,

pesticides, organic solvents, ionizing radiation, heavy metals, benzene, mercury, boron, or other potentially toxic chemicals. Fourth, we asked about their occupation and living styles. We asked whether they were raised in the country or in the city. Many of our subjects were students, some office workers and others tradesmen (gardeners, builders etc.). We asked how many hours per day they spent seated. Finally, we asked if they carried a mobile phone, and if so where they stored their phone, the amount of time it was left on standby, and the amount of time per day they spent on calls. We also noted the subject's ethnicity.

- Auger, J., Eustache, E., Andersen, A. G., Irvine, D. S., Jørgensen, N., Skakkebak, N. E., Suominen, J., Toppari, J., Vierula, M. & Jouannet, P. 2001 Sperm morphological defects related to environment, lifestyle and medical history of 1001 male partners of pregnant women from four European cities. *Human Reproduction* **16**, 2710-2717.
- Chia, S. E., Lim, S. T. A., Tay, S. K. & Lim, S. T. 2000 Factors associated with male infertility: a case-control study of 218 infertile and 240 fertile men. *British Journal of Obstetrics and Gynaecology* **107**, 55-61.
- Figa-Talamanca, I., Cini, C., Varricchio, G. C., Dondero, F., Gandini, L., Lenzi, A., Lombardo, F., Angelucci, L., DiGrazia, R. & Patacchioli, F. R. 1996 Effects of prolonged automobile driving on male reproductive function: A study among taxi drivers. *American Journal of Industrial Medicine* **30**, 750-758.
- Sharpe, R. M. 2000 Lifestyle and environmental contribution to male infertility. *British Medical Bulletin* **56**, 630-642.
- Tsujimura, A., Matsumiya, K., Takahashi, T., Yamanaka, M., Koga, M., Miura, H., Nishimura, K., Takeyama, M., Fujioka, H., Okamoto, Y., Iwamoto, T. & Okuyama, A. 2004 Effect of lifestyle factors on infertility in men. *Archives of Andrology* **50**, 15-17.

**Table A1** Generalised linear model of variables influencing the percentage of motile sperm in an ejaculate. Raw means  $\pm$  SE are presented for each level of the nominal variables and the partial slopes\* are presented for continuous variables. The partial F ratios test the effect of each variable controlling for all others. Least squares means show the relative motility controlling for all other effects in the model.

| Variable                                  | Mean   | $\pm$ SE | Least Squares Mean | F Ratio | Degrees of Freedom |       | P      |
|-------------------------------------------|--------|----------|--------------------|---------|--------------------|-------|--------|
|                                           |        |          |                    |         | Source             | Error |        |
| Treatment                                 |        |          |                    |         |                    |       |        |
| - Image Set 1                             | 52.10  | 7.26     | 8.21               | 5.079   | 1                  | 23    | 0.0340 |
| - Image Set 2                             | 49.28  | 8.03     | 2.55               |         |                    |       |        |
| Image Rating                              |        |          |                    |         |                    |       |        |
| No Response                               | 46.63  | 8.80     | 3.43               | 3.952   | 3                  | 23    | 0.0207 |
| Less Explicit                             | 38.03  | 8.39     | -3.41              |         |                    |       |        |
| Similar                                   | 52.75  | 7.52     | 6.40               |         |                    |       |        |
| More Explicit                             | 58.74  | 7.67     | 15.11              |         |                    |       |        |
| Liquefied                                 |        |          |                    |         |                    |       |        |
| - Non-Liquefied                           | 33.73  | 8.72     | -5.91              | 15.32   | 1                  | 23    | 0.0007 |
| - Liquefied                               | 51.84  | 7.39     | 16.68              |         |                    |       |        |
| Age (years)                               | 1.49*  | 0.37*    | –                  | 16.53   | 1                  | 23    | 0.0005 |
| Combined Testes Volume (cm <sup>3</sup> ) | 9.62*  | 2.92*    | –                  | 10.88   | 1                  | 23    | 0.0031 |
| Height (cm)                               | -0.75* | 0.26*    | –                  | 8.339   | 1                  | 23    | 0.0083 |
| Childhood Upbringing                      |        |          |                    |         |                    |       |        |
| - Rural                                   | 49.44  | 8.01     | 0.35               | 6.791   | 1                  | 23    | 0.0158 |
| - Urban                                   | 51.16  | 7.57     | 10.42              |         |                    |       |        |
| Self-Rated Stress                         |        |          |                    |         |                    |       |        |
| - None                                    | 49.31  | 7.44     | 1.68               | 7.662   | 2                  | 23    | 0.0028 |
| - Temporary Stress                        | 55.18  | 7.36     | 14.73              |         |                    |       |        |
| - Regular Stress                          | 51.84  | 8.75     | -0.26              |         |                    |       |        |
| Occupation                                |        |          |                    |         |                    |       |        |
| - Student                                 | 51.03  | 7.80     | 4.57               | 10.00   | 2                  | 23    | 0.0007 |
| - Office worker                           | 47.79  | 7.93     | -6.67              |         |                    |       |        |
| - Tradesman                               | 52.19  | 8.40     | 18.26              |         |                    |       |        |
| Dietary Factors                           |        |          |                    |         |                    |       |        |
| - Un-Balanced Diet                        | 55.69  | 8.28     | 8.39               | 3.215   | 1                  | 23    | 0.0861 |
| - Balanced Diet                           | 49.77  | 7.15     | 2.38               |         |                    |       |        |
| Weekly Alcohol Consumption                |        |          |                    |         |                    |       |        |
| - 0 Drinks                                | 57.70  | 7.55     | 5.39               | 11.85   | 3                  | 23    | <.0001 |
| - 1 to 4 Drinks                           | 49.25  | 6.07     | 18.44              |         |                    |       |        |
| - 5 to 7 Drinks                           | 46.49  | 5.81     | 7.99               |         |                    |       |        |
| - 8 + Drinks                              | 52.30  | 5.19     | 28.03              |         |                    |       |        |
| Caffeine Consumption                      |        |          |                    |         |                    |       |        |
| - 0 cups                                  | 47.56  | 7.55     | 5.39               | 32.28   | 2                  | 23    | <.0001 |
| - 1 to 3 cups                             | 52.36  | 6.99     | 24.30              |         |                    |       |        |
| - 4 + cups                                | 46.23  | 8.91     | 0.65               |         |                    |       |        |
| Cigarette Smoking                         |        |          |                    |         |                    |       |        |
| - Non Smoker                              | 50.99  | 6.64     | 20.83              | 28.37   | 1                  | 23    | <.0001 |
| - >1 Cigarette <i>per</i> Day             | 49.33  | 9.31     | -10.06             |         |                    |       |        |
| Partner                                   |        |          |                    |         |                    |       |        |
| - No                                      | 49.45  | 7.78     | -0.49              | 18.15   | 1                  | 23    | 0.0003 |
| - Yes                                     | 52.15  | 7.57     | 11.26              |         |                    |       |        |
| Frequency of Ejaculation                  |        |          |                    |         |                    |       |        |
| - 1 to 2 <i>per</i> Week                  | 46.41  | 7.55     | 5.39               | 11.51   | 3                  | 23    | <.0001 |
| - 3 to 4 <i>per</i> Week                  | 51.81  | 8.87     | -1.31              |         |                    |       |        |
| - 5 to 6 <i>per</i> Week                  | 54.31  | 8.58     | 7.05               |         |                    |       |        |
| - 7 + <i>per</i> Week                     | 50.89  | 7.89     | 30.07              |         |                    |       |        |
| Time taken to obtain sample (mins)        | -2.25* | 0.62*    | –                  | 13.05   | 1                  | 23    | 0.0015 |
| Time of Day (when ejaculated)             | 2.07*  | 1.00*    | –                  | 4.301   | 1                  | 23    | 0.0495 |
| Ejaculation to Analysis (mins)            | -2.88* | 0.79*    | –                  | 13.31   | 1                  | 23    | 0.0013 |
| Mobile Phone Storage                      |        |          |                    |         |                    |       |        |
| - Alternative                             | 55.43  | 7.37     | 16.48              | 33.28   | 1                  | 23    | <.0001 |
| - Pocket or Belt                          | 49.25  | 8.19     | -5.71              |         |                    |       |        |

**Table A2** Generalised linear model of variables influencing the number of sperm per ml of ejaculate (natural log transformed). Raw mean  $\pm$  SE number of sperm ( $\times 10^6$ ) are presented for each level of the nominal variables and the partial slopes\* are presented for continuous variables. The partial F ratios test the effect of each variable controlling for all others. Least squares means show the natural log transformed relative number of sperm controlling for all other effects in the model.

| Variable                                  | Mean  | $\pm$ SE | Least Squares Mean | F Ratio | Degrees of Freedom |       | p      |
|-------------------------------------------|-------|----------|--------------------|---------|--------------------|-------|--------|
|                                           |       |          |                    |         | Source             | Error |        |
| Treatment                                 |       |          |                    |         |                    |       |        |
| - Image Set 1                             | 61.35 | 1.27     | 3.65               | 8.476   | 1                  | 36    | 0.0061 |
| - Image Set 2                             | 76.64 | 1.26     | 4.09               |         |                    |       |        |
| Image Rating                              |       |          |                    |         |                    |       |        |
| No Response                               | 64.63 | 1.30     | 3.85               | 5.353   | 3                  | 36    | 0.0037 |
| Less Explicit                             | 47.39 | 1.37     | 3.28               |         |                    |       |        |
| Similar                                   | 73.01 | 1.25     | 4.01               |         |                    |       |        |
| More Explicit                             | 72.84 | 1.30     | 4.34               |         |                    |       |        |
| Ethnicity                                 |       |          |                    |         |                    |       |        |
| - Caucasian                               | 70.16 | 1.22     | 4.25               | 4.563   | 1                  | 36    | 0.0396 |
| - Asian                                   | 50.58 | 1.35     | 3.62               |         |                    |       |        |
| Combined Testes Volume (cm <sup>3</sup> ) | 2.56* | 1.20*    | –                  | 26.25   | 1                  | 36    | <.0001 |
| Occupation                                |       |          |                    |         |                    |       |        |
| Student                                   | 69.45 | 1.28     | 4.17               | 9.618   | 2                  | 36    | 0.0005 |
| Office worker                             | 47.05 | 1.35     | 3.14               |         |                    |       |        |
| Tradesman                                 | 83.15 | 1.29     | 4.31               |         |                    |       |        |
| Hours Seated per Day                      |       |          |                    |         |                    |       |        |
| - 0 to 4 hours                            | 77.46 | 1.25     | 3.87               | 6.181   | 2                  | 36    | 0.0049 |
| - 5 to 7 hours                            | 72.72 | 1.29     | 3.42               |         |                    |       |        |
| - 8 + hours                               | 51.41 | 1.31     | 3.11               |         |                    |       |        |
| Environmental Factors                     |       |          |                    |         |                    |       |        |
| - 0 Factors                               | 63.23 | 1.25     | 3.87               | 3.006   | 2                  | 36    | 0.0621 |
| - 1 Factor                                | 80.17 | 1.39     | 4.26               |         |                    |       |        |
| - 2 to 4 Factors                          | 91.51 | 1.39     | 3.46               |         |                    |       |        |
| Caffeine Consumption                      |       |          |                    |         |                    |       |        |
| - 0 cups                                  | 66.68 | 1.25     | 3.87               | 3.656   | 2                  | 36    | 0.0359 |
| - 1 to 3 cups                             | 68.51 | 1.22     | 4.44               |         |                    |       |        |
| - 4 + cups                                | 66.75 | 1.31     | 4.39               |         |                    |       |        |
| Mobile Phone Storage                      |       |          |                    |         |                    |       |        |
| - Alternative                             | 75.67 | 1.30     | 4.21               | 12.09   | 1                  | 36    | 0.0013 |
| - Pocket or Belt                          | 65.60 | 1.26     | 3.54               |         |                    |       |        |
